# Supplementary material for: A screening tool for psychological difficulties in children aged 6 to 36 months: cross-cultural validation in Kenya, Cambodia and Uganda
Source: Springer Nature journal article supplement (doi:10.1186/s12887-019-1461-3), 2019-04-12
Supplement: MOESM3 [file 16652834]

**Frequency of positive responses (Sometimes/occasionally; Often/frequently) per item of the PSYCa 6-36 according to the CGIS score of the children (>1 versus 1), cross cultural validation study, Kenya, Cambodia, Uganda.**

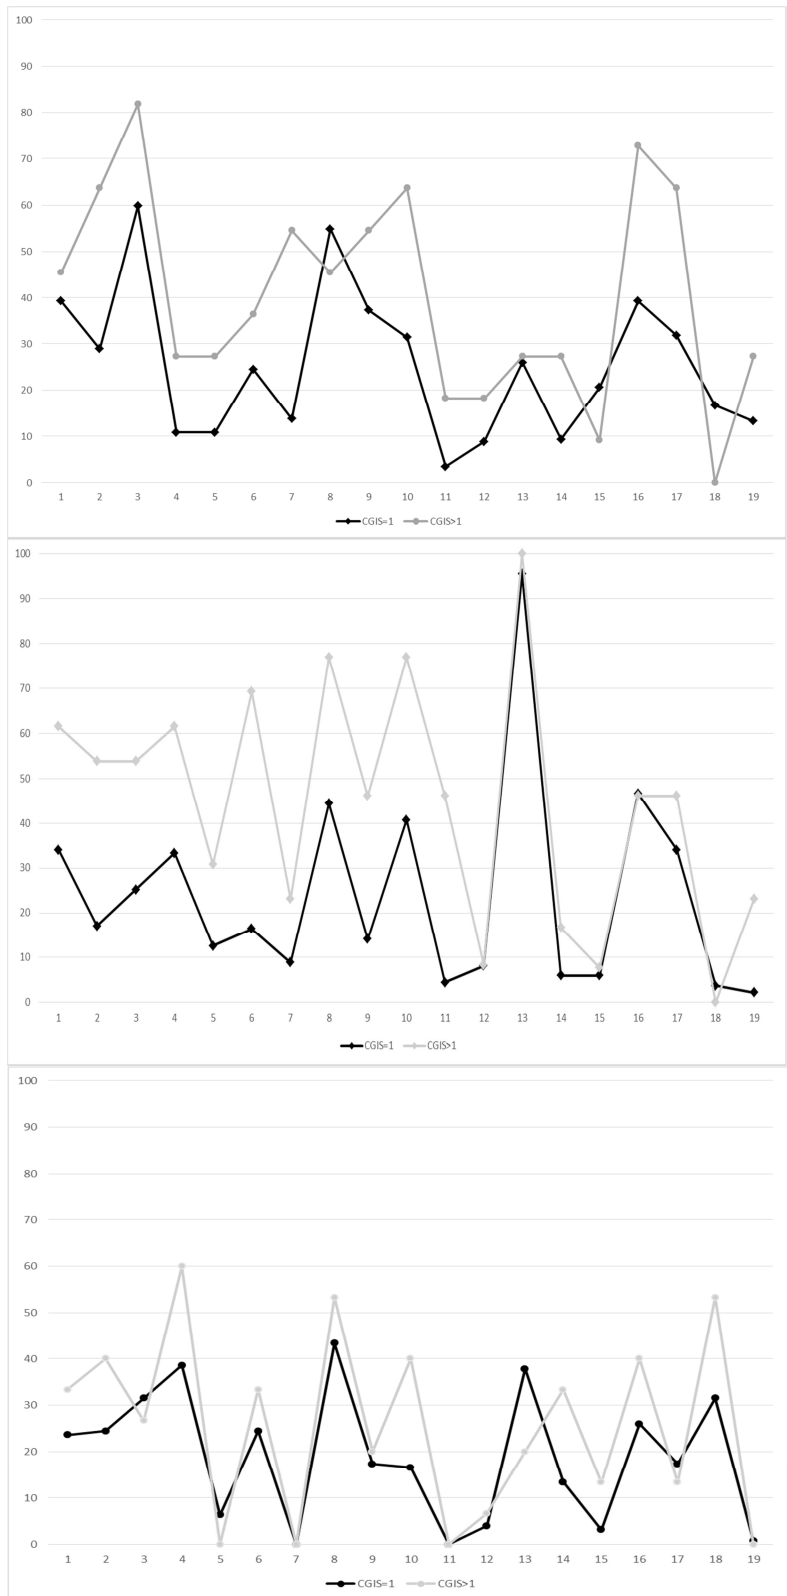

**(Upper: Kenya; Middle: Cambodia; Lower, Uganda)**
